# 1 Association of 25-OH Vitamin D Levels With In-Hospital 2 Mortality: A cross-sectional, observational study of the MIMICIV 3 database

4 Yaotang Wang,<sup>1</sup> Weijing Lv<sup>2\*</sup>, Haixia Yu<sup>3,4\*</sup>

5 <sup>1</sup>Department of Inner Mongolia Medical University, Inner Mongolia People's Hospital,  
6 Hohhot, Inner Mongolia, 010000, China.

7 <sup>2</sup>Department of Critical Care Medicine, Beijing Renhe Hospital, 102600, China.

8 <sup>3</sup>Affiliated Inner Mongolia People's Hospital of Inner Mongolia Medical University, Inner  
9 Mongolia, China.

10 <sup>4</sup>Department of Geriatric Medicine, Inner Mongolia People's Hospital, Hohhot, Inner  
11 Mongolia, China.

12 Correspondence should be addressed to

13 Weijing Lv: [lwj@stu.hebmu.edu.cn](mailto:lwj@stu.hebmu.edu.cn)

14 Haixia Yu: [yuhaixia6666@163.com](mailto:yuhaixia6666@163.com)

## 15 Abstract

16 The relationship between 25-OH Vitamin D3 and hospital death continues to be a topic of  
17 controversy. At present, the available evidence regarding the relationship between 25-OH  
18 Vitamin D and hospital death is inadequate. Therefore, we conducted a cross-sectional study  
19 involving 197 sepsis-3 participants from MIMIC-IV. Basic information, laboratory indicators,

**NOTE: This preprint reports new research that has not been certified by peer review and should not be used to guide clinical practice.**

20 underlying Disease, therapeutic medications and tools, disease score were obtained from all  
21 participants. Serum 25-OH Vitamin D was collected on Intensive Care Unit (ICU) admission,  
22 and inpatient mortality were analyzed. The logistic regression, fitting curve and interaction  
23 effects were utilized to substantiate the correlation of serum 25-OH Vitamin D with inpatient  
24 mortality. Furthermore, interaction and subgroup analyses were evaluated for the consistency  
25 of these correlations. A total of 197 patients were included in the analysis, with an average  
26 age of 59.8 years and 43.1% male. The mean 25-OH vitamin D level in the cohort was 21  
27 ng/mL. We observed no significant association between higher 25-OH vitamin D levels and  
28 increased inpatient mortality rates. The in-hospital mortality did not differ among patients  
29 vitamin D deficiency, insufficiency and sufficiency group (15.7% vs 17.4% vs 24.5%,  
30  $p=0.417$ ). A multivariable adjusted logistic regression model showed that vitamin D levels  
31 could not predict in-hospital mortality (OR 1.02 95% CI: 0.98~1.05,  $p=0.342$ , Model 3). In  
32 conclusion, 25-OH vitamin D detected upon ICU admission was not associated with in-  
33 hospital mortality in patients with sepsis.

34 Keywords:25-OH vitamin D,sepsis,mortality

## 35 **Introduction**

36 Sepsis is a serious condition caused by the body's abnormal response to an infection,  
37 resulting in life-threatening organ dysfunction(1). It is a leading cause of death in intensive  
38 care unit (ICU) patients, and its mortality rates have increased to over 30% due to factors  
39 such as global aging, invasive surgeries, immunosuppressant usage, and the rise of antibiotic-  
40 resistant bacteria(2). To address this, it is crucial to study the factors that impact sepsis  
41 mortality in order to reduce the mortality rate.

42 Vitamin D, a fat-soluble hormone, plays a crucial role in regulating calcium and phosphorus  
43 levels, maintaining bone and cardiovascular health(3), and boosting immunity(4).

44 Vitamin D is an essential nutrient for humans that was discovered in 1921. In addition to  
45 regulating calcium and phosphate metabolism, it is important for immunity, endothelial  
46 function, and antimicrobial activity(5). Previous related studies have evaluated the  
47 relationship between vitamin D deficiency and mortality risk in patients with sepsis. A two-  
48 center observational study said that 25-OH vitamin D deficiency prior to hospital admission  
49 is a significant predictor of sepsis in the critically ill, which has an increased risk of mortality  
50 following critical care initiation(6). While, a prospective multicentre observational study  
51 illustrated that 25-OH vitamin D deficiency detected upon ICU admission was not associated  
52 with 90-day mortality in patients with severe sepsis(7).

53 It is unclear whether lower serum 25 (OH) D predicts poor outcome in sepsis. Therefore, we  
54 aimed to conduct an association analysis of the MIMIC data to comprehensively assess the  
55 relationship between serum 25 (OH) D and the risk of in-hospital mortality in adult patients  
56 with sepsis.

## 57 **Materials and Methods**

### 58 **Data Source**

59 We performed a retrospective cohort study using the Medical Information Mart for Intensive  
60 Care (MIMIC-IV) (version 2.2)(8,9), which is a large publicly accessed database. The use of  
61 this database has been approved by the Massachusetts Institute of Technology and the  
62 Institutional Review Board of Beth Israel Deaconess Medical Center (BIDMC, Boston, MA,  
63 USA). One of the authors, Yaotang Wang, accomplished the National Institutes of Health's  
64 web-based course "Data or Specimens Only Research"(Record ID: 59979404) and "Conflicts  
65 of Interest"(Record ID: 59979406) and was approved to access the database to extract data.  
66 To protect patient privacy, all data were de-identified. Thus, informed consent was waived by

67 the ethical committee of the Beth Israel Deaconess Medical Center. This study is described in  
68 conformity to the strengthening the Reporting of observational studies in Epidemiology  
69 (STROBE) statement and was managed to conform to the tenets of the Declaration of  
70 Helsinki.

## 71 **Study Population and Variable Extraction**

72 The total number of patients in the MIMIC-IV included 299,712 individuals from 2008 to  
73 2019, of which 73,181 were admitted to the ICU. Among them, 25647 patients with sepsis-3  
74 were selected based on definition(10). Patients >18 years were initially enrolled in this study,  
75 and only data for the first hospitalization and ICU stay were collected for patients. Meanwhile,  
76 patients without serum 25-OH-VitaminD after ICU admission who stayed in the ICU were  
77 excluded. Thus, only 197 patients were included in this study after further excluding  
78 covariates with missing values(Figure 1). The first test serum 25-OH-VitaminD after ICU  
79 admission was extracted as the interest variable and the major exposure factor in this study.  
80 All variables in this study were extracted from the MIMIC-IV database using Structured  
81 Query Language (SQL) with PostgreSQL. Demographic variables, including age, sex,  
82 ethnicity and marital status, were obtained. Clinical severity on admission was examined  
83 using the APACHE II score and SOFA score. Vital signs in this study also included, such as  
84 temperature, heart rate, respiratory rate (RR), and percutaneous oxygen saturation (SpO<sub>2</sub>).  
85 Comorbidities, including myocardial infarction, congestive heart failure, chronic pulmonary  
86 disease, renal failure, diabetes without complication, diabetes with complication and renal  
87 disease and malignant cancer, were also included for analysis based on the recorded ICD-9  
88 and ICD-10 codes from the database. Laboratory variables, including hematocrit, platelet  
89 count, white blood cell (WBC) count, anion gap, bicarbonate, sodium, potassium, glucose,  
90 chloride, creatinine and blood urea nitrogen (BUN), were obtained within the first test after  
91 ICU admission. The details of the missing value are shown in Table 1.

## 92 **Outcomes**

93 The primary endpoint was hospital inpatient death, which was defined by patient survival  
94 status at the time of hospital.

## 95 **Statistical analysis**

96 Continuous variables were described as means±standard deviation (SD) or as median  
97 interquartile ranges (IQR), and categorical variables were described as percentages. We used  
98 Fisher's exact and Chi-square tests or the Kruskal-Wallis test to examine the statistical diff  
99 erences among three groups—the deficient serum 25-OH-VitaminD (AG <19.9ng/ml),  
100 insufficient serum 25-OH-VitaminD(20ng/ml≤25-OH-VitaminD<30ng/ml) and sufficient 25-  
101 OH-VitaminD(> 30ng/ml)groups(11). We used multivariate logistic regression models to  
102 evaluate the relationship of serum 25-OH-VitaminD and inpatient mortality. Restricted cubic  
103 spline analysis was used to describe the non-linear association between serum 25-OH-  
104 VitaminD and inpatient mortality.

105 Baseline variables that were considered clinically relevant or had a change in effect estimate  
106 of >10% were chosen as confounders. In Model I, the covariates were adjusted for  
107 age,gender,temperature,SpO<sub>2</sub>,marital status,potassium. As for adjusted model, the covariates  
108 were additionally included with myocardial infraction,diabetes with complications and  
109 vasopressors post.

110 Furthermore,interactions and stratified analyses were conducted using  
111 age,gender,temperature,SpO<sub>2</sub>,marital status,potassium,myocardial infraction,diabetes with  
112 complications and vasopressors post, as previously described. For the missing data, we  
113 directly excluded them. All results were expressed as odds ratios (OR) with a 95% CI, and a  
114 p-value of <0.05 was considered significant. All analyses were performed using the statistical

115 software packages R 3.3.2 (<http://www.R-project.org>, The R Foundation) and Free Statistics  
116 software version 1.9.2 (Beijing, China)(12).

## 117 **Results**

### 118 **Baseline Characteristics of Subjects**

119 In total, 216 of the 25647 sepsis-3 patients who received 25-OH-VitaminD measurement  
120 were included in this study (Figure 1). Excluding those with missing some covariates, a total  
121 of 197 people were included in the final study. Among them, there were 85 males and 112  
122 females, and the mean age was  $59.8 \pm 16.9$ . The distribution of the baseline population  
123 characteristics according to serum 25-OH-VitaminD levels in tertiles is described in Table 2.  
124 The patients with sufficient serum 25-OH-VitaminD levels ( $\geq 30\text{ng/ml}$ ) were found to have a  
125 higher age and bicarbonate, a lower anion gap and creatine level.

126

### 127 **Association between 25-OH Vitamin D Levels and inpatient mortality**

128 Table 2 presents the results of the multivariable logistic regression analysis examining the  
129 association between 25-OH-VitaminD and inpatient death. A high 25-OH-VitaminD wasn't  
130 associated with an increased risk of inpatient death (Per 1 unit: OR=1.02 , 95% CI=0.98~1.05,  
131 P=0.342), after adjusting for potential confounders (Table 2, all adjusted model). When 25-  
132 OH-VitaminD was divided into three tertiles, multivariable-adjusted regression odds ratio  
133 (95% CIs) of 25-OH-VitaminD associated with based on 25-OH-VitaminD of group1 and  
134 group2 was 0.76 (95% CI=0.29~1.99, p=0.574), and 0.75 (95% CI=0.25~2.23, p=0.601)  
135 when comparing the 25-OH-VitaminD sufficient group, respectively (Table 2, all-adjusted  
136 model).

137 Evidence from the estimated dose-response curve indicated a linear relationship between 25-  
138 OH Vitamin D and risk of inpatient death (Figure 3, P for non-linearity =0.176, restricted  
139 cubic spline analyses adjusted for multiple variables, and the highest and lowest 0.5% was  
140 trimmed for each 25-OH Vitamin D measure.)

### 141 **Subgroup Analysis**

142 Subgroup analyses were performed to evaluate the association between serum 25-OH  
143 Vitamin D levels and inpatient mortality (Figure 4) among subgrs. Based on the variables  
144 tested, an association between higher serum 25-OH Vitamin D level and inpatient mortality  
145 was observed in different subgroups (age ,gender,anion gap, sofa score and vasopressor post)  
146 (p >0.05 for all).

### 147 **Discussion**

148 Vitamin D is involved in the inflammatory response and in the regulation of the body's  
149 immunity. There are many conflicting research opinions on the correlation between vitamin D  
150 and sepsis mortality, with some studies suggesting that lower vitamin D levels are associated  
151 with increased mortality in sepsis patients. However, there have been other studies that have  
152 found no significant effect of vitamin D supplementation on survival in sepsis patients.  
153 Therefore, while there are some studies that support an association between vitamin D and  
154 sepsis mortality, this is an area where further research is needed to draw definitive  
155 conclusions.

156 The mechanism by which vitamin D deficiency is associated with sepsis death may be due to  
157 an increased susceptibility to sepsis caused by the dysfunction of immune cells as well as  
158 barrier cells(13). On the other hand, the reduction of 1,25 (OH) 2D3 at the tissue level may  
159 reduce the body's ability to regulate autoimmunity and affect the expression of antimicrobial

160 peptides(14), affect the body's innate immune regulation, and further increase the sepsis  
161 susceptibility(15).

162 Two meta-analyses from 2014 and 2015 suggested that vitamin D deficiency increased  
163 susceptibility for sepsis(16,17). A prospective study of 88 patients showed that low serum  
164 vitamin D level on admission (<8.1 ng/mL) was associated with increased 28-day mortality  
165 in sepsis, and multivariate COX regression analysis showed that vitamin D concentrations  
166 <8.1 ng/mL (p=0.01) and septic shock (p=0.02) were associated with increased mortality in  
167 sepsis. The hazard ratio for 28-day mortality with a vitamin D level <8.1 ng/mL was 1.95  
168 (95% CI 1.15 – 3.29, p=0.01, and the mean survival of patients with vitamin D levels <8.1  
169 ng/mL was 9 days (median 6 days), while those with vitamin D levels of 8.1 ng / mL had a  
170 mean survival of 14 days (median 10 days)(18). A study of the role of 1,25-dihydroxyvitamin  
171 d3 in experimental sepsis showed no regulation of vitamin D in lipopolysaccharide-induced  
172 sepsis(19).A study of 116 cases on the relationship between vitamin D and COVID-19  
173 inflammation storm showed that high-dose vitamin D is considered a promising treatment to  
174 inhibit cytokine storms in COVID-19 patients, and is associated with better clinical  
175 improvement and less adverse outcomes(20).An observational study showed that 107  
176 critically ill adult patients with sepsis reported vitamin D deficiency in 93.5% of patients, and  
177 53.3% of them showed extremely low 25 (OH) D flow concentration (7 ng/mL), specifically,  
178 extremely low 25 (OH) D flow concentration and higher mean SAPS 2 score were  
179 independent predictors of sepsis-related mortality(21).

180 Compared with the previous study, our study reached a different conclusion, our results show:  
181 in multivariate regression analysis, in vitamin D sufficient group, insufficient group, and lack  
182 group, unadjusted model, model 1 and full model respectively, shows that VD and in-hospital  
183 mortality no curve relationship and multivariate analysis without statistical significance, VD



184 is neither dangerous nor protective factors, and model OR changes between each group, the  
185 model is robust.

186 Although most studies showed a significant inverse association between vitamin D level and  
187 mortality, there are also previous studies consistent with our findings. A single-center  
188 prospective study showed that vitamin D was not associated with in-hospital mortality(22).  
189 An additional prospective study of 461 people analyzing the association of 25 (OH) D and  
190 1,25 (OH) D with sepsis mortality also showed that vitamin D did not predict death in  
191 patients with sepsis(23).

192 In addition, the epidemiological results of our study showed that the total number of 25-OH-  
193 VitaminD (<19.9) and 25 (2025-OH-VitaminD <30) (51%, 23%) and 49 (30 25-OH-  
194 VitaminD) in the adequacy group 49 (24%). The mortality rate in the VD deficiency group  
195 was 15.7% versus 24.5%, respectively. The difference between 25-OH-VitaminD deficiency  
196 was insignificant (15.7VS17.4% VS 24.5%,  $p=0.417$ ). Accordingly, a prospective  
197 observational study conducted by Konlawij Trongtrakul et al had expressed that among septic  
198 patients the total number of 25-OH-VitaminD deficient (<20 ng/mL) and non-deficient ( $\geq 20$   
199 ng/mL) was 110, or 83,27 (75%, 25%, respectively). The mortality rate in the VD deficient  
200 and non-deficient groups were 16% versus 4%, respectively. The total number of patients  
201 (<12 ng/mL) (12 ng/mL) was 53,57, respectively, mortality in the VD deficiency group was  
202 23% versus 4% in the non-severe deficiency group, respectively, 30-day in-hospital mortality  
203 was not significantly higher in the vitamin D deficiency group (16% vs 4%,  $p=0.18$ ), but the  
204 difference between the severe deficiency group and the non-severe group was significant  
205 (23% vs 4%,  $p=0.02$ )(25). Compared with the similar studies, the vitamin d deficiency  
206 groups in the two studies showed similar mortality (15.7% VS 16%), but not in deficiency  
207 (20 ng/ml) (10% VS 4%). In our study, the population in the vitamin D non-deficiency group,

208 mortality was higher than that in the other study populations and no significant relation  
209 among tertiles were found.

210 The reasons for the above results may be as follows: First, the sepsis patients admitted to ICU  
211 are in critical condition, and after a period of poor treatment effect, they eventually develop  
212 critically ill. As a result, most of the patients are in bed or semi-bed state, with insufficient  
213 light, poor diet and decreased absorption capacity. Second, most of the patients in ICU were  
214 septic shock. On the first day of admission, after a large amount of fluid resuscitation  
215 treatment, dilutional factors led to the relative reduction of vitamin D. The underlying causes  
216 for these findings could be: Initially, patients with sepsis in the ICU are in a critical state, and  
217 following a phase of ineffective treatment, they ultimately become critically ill. Consequently,  
218 a majority of the patients remain in a bed or semi-bed condition, suffering from inadequate  
219 lighting, a substandard diet, and reduced absorption ability. A majority of ICU patients  
220 experienced septic shock. Upon initial hospital admission, following extensive fluid  
221 resuscitation, factors causing dilution resulted in a noticeable decrease in vitamin D levels.  
222 Additionally, the observational design of the study meant that its findings could only indicate  
223 a correlation, not a direct cause-and-effect link. Thirdly, there could be complicating  
224 elements that the multivariate regression analysis overlooked.

225 Overall, our study produced negative results, probably because the vitamin D and sepsis  
226 and related covariates in MIMIC-IV database, only 197 people, sample size factors, of course,  
227 there are bias in retrospective cohort study, further for the large sample population and  
228 multicenter study, look forward to further clarify the correlation between vitamin D and  
229 sepsis patients mortality, hope early detection of sepsis patients and reduce the incidence and  
230 mortality of severe patients.

## 231 **Conclusions**

232 In conclusion, vitamin D deficiency at ICU admission was not associated with in-hospital  
233 mortality in sepsis patients.

234

## 235 **Data Availability**

236 The MIMIC data analyzed in the current study are publicly available.

## 237 **Conflicts of Interest**

238 The authors declare that the research was conducted in the absence of any commercial or  
239 financial relationships that could be construed as a potential conflict of interest.

## 240 **Funding Statement**

241 This research did not receive any specific grant from funding agencies in the public,  
242 commercial, or not-for-profit sectors.

## 243 **Acknowledgments**

244 We would like to thank the Massachusetts Institute of Technology and the Beth Israel  
245 Deaconess Medical Center for the MIMIC-IV database. We thank Dr. Jie Liu of the  
246 Department of Vascular and Internal Medicine, People's Liberation Army General Hospital,  
247 China, for his assistance. Dr. Jie Liu, Department of Vascular and Internal Medicine, People's  
248 s Liberation Army General Hospital, China, for his contributions to statistical support, study  
249 design consultation, and comments on the manuscript.

250

## 251 **Supplementary Materials**

252 Figures and tables are separately unloaded on dashboard.

## 253 References

- 254 [1] Singer, M. et al. (2016). The Third International Consensus Definitions for Sepsis and  
255 Septic Shock (Sepsis-3). *JAMA*. DOI: 10.1001/jama.2016.0287.
- 256 [2] Gotts, J.E. and Matthay, M.A. (2016). Sepsis: pathophysiology and clinical  
257 management. *BMJ*. DOI: 10.1136/bmj.i1585.
- 258 [3] Zittermann, A. et al. (2021). Vitamin D and Cardiovascular Disease: An Updated  
259 Narrative Review. *International Journal of Molecular Sciences*. DOI:  
260 10.3390/ijms22062896.
- 261 [4] <https://pubmed.ncbi.nlm.nih.gov/29080635/>.
- 262 [5] <https://pubmed.ncbi.nlm.nih.gov/36265656/>.
- 263 [6] Moromizato, T. et al. (2014). Association of Low Serum 25-Hydroxyvitamin D Levels  
264 and Sepsis in the Critically Ill: *Critical Care Medicine*. DOI:  
265 10.1097/CCM.0b013e31829eb7af.
- 266 [7] Ala-Kokko, T.I. et al. (2016). Vitamin D deficiency at admission is not associated with  
267 90-day mortality in patients with severe sepsis or septic shock: Observational  
268 FINNAKI cohort study. *Annals of Medicine*. DOI: 10.3109/07853890.2015.1134807.
- 269 [8] <https://physionet.org/content/mimiciv/2.2/>.
- 270 [9] <https://www.nature.com/articles/s41597-022-01899-x>.
- 271 [10] Singer, M. et al. (2016). The Third International Consensus Definitions for Sepsis and  
272 Septic Shock (Sepsis-3). *JAMA*. DOI: 10.1001/jama.2016.0287.
- 273 [11] Holick, M.F. et al. (2011). Evaluation, treatment, and prevention of vitamin D  
274 deficiency: an Endocrine Society clinical practice guideline. *The Journal of Clinical*  
275 *Endocrinology and Metabolism*. DOI: 10.1210/jc.2011-0385.
- 276 [12] Ruan, Z. et al. (2022). Association Between Psoriasis and Nonalcoholic Fatty Liver  
277 Disease Among Outpatient US Adults. *JAMA Dermatology*. DOI:  
278 10.1001/jamadermatol.2022.1609.
- 279 [13] Hewison, M. et al. (2004). Vitamin D and barrier function: a novel role for extra-renal  
280  $1\alpha$ -hydroxylase. *Molecular and Cellular Endocrinology*. DOI:  
281 10.1016/j.mce.2003.11.017.
- 282 [14] Sun, J. (2010). Vitamin D and mucosal immune function. *Current Opinion in*  
283 *Gastroenterology*. DOI: 10.1097/MOG.0b013e32833d4b9f.
- 284 [15] <https://www.sciencedirect.com/science/article/pii/S1931312809003114>.
- 285 [16] <https://pubmed.ncbi.nlm.nih.gov/25475621/>.
- 286 [17] <https://bmcanesthesiol.biomedcentral.com/articles/10.1186/s12871-015-0063-3>.
- 287 [18] Asdie, R.H. et al. (2023). Assessment of 28-day survival of patients with sepsis based  
288 on vitamin D status: hospital-based prospective cohort study in Indonesia. *Pan African*  
289 *Medical Journal*. DOI: 10.11604/pamj.2023.45.76.36336.
- 290 [19] Møller, S. et al. (2007). Effect of 1,25-dihydroxy-vitamin D3 in experimental sepsis.  
291 *International Journal of Medical Sciences*. DOI: 10.7150/ijms.4.190.
- 292 [20] Sarhan, N. et al. (2022). Evidence for the Efficacy of a High Dose of Vitamin D on the  
293 Hyperinflammation State in Moderate-to-Severe COVID-19 Patients: A Randomized  
294 Clinical Trial. *Medicina (Kaunas, Lithuania)*. DOI: 10.3390/medicina58101358.
- 295 [21] De Pascale, G. et al. (2016). Clinical and microbiological outcome in septic patients  
296 with extremely low 25-hydroxyvitamin D levels at initiation of critical care. *Clinical*  
297 *Microbiology and Infection: The Official Publication of the European Society of*  
298 *Clinical Microbiology and Infectious Diseases*. DOI: 10.1016/j.cmi.2015.12.015.

- 299 [22] Suberviola, B. et al. (2019). Vitamin D binding protein, but not vitamin D or vitamin  
300 D-related peptides, is associated with septic shock mortality. *Enfermedades Infecciosas  
301 Y Microbiologia Clinica (English Ed.)*. DOI: 10.1016/j.eimc.2018.06.011.
- 302 [23] Ratzinger, F. et al. (2017). 25(OH)D and 1,25(OH)D vitamin D fails to predict sepsis  
303 and mortality in a prospective cohort study. *Scientific Reports*. DOI:  
304 10.1038/srep40646.
- 305 [24] Trongtrakul, K. and Feemuchang, C. (2017). Prevalence and association of vitamin D  
306 deficiency and mortality in patients with severe sepsis. *International Journal of  
307 General Medicine*. DOI: 10.2147/IJGM.S147561.

308

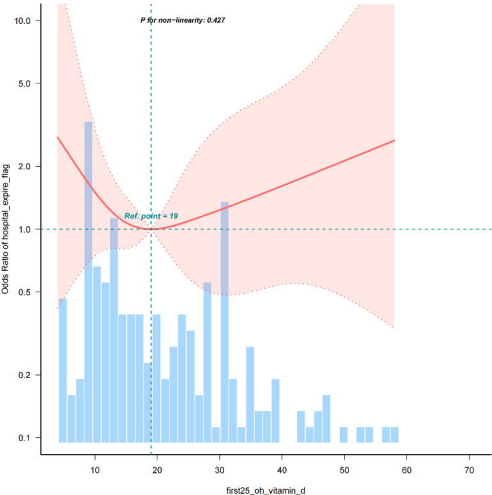

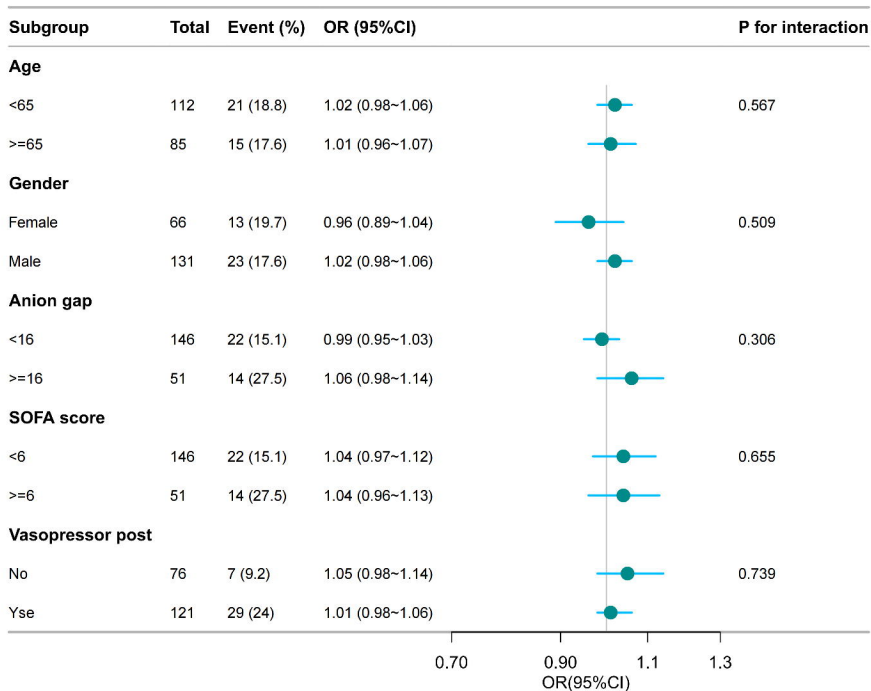

Source: https://medrxiv.org/content/10.1101/2024.06.05.24308492v1.full.pdf
